# Supplementary material
Source: HighWire-hosted journal article supplement (https://bmjopen.bmj.com/content/13/8/e074127)
Supplement: inline-supplementary-material-2 [file inline-supplementary-material-2.pdf]

**Table 1** Data summary

| STUDY DESCRIPTION                                                                                                                                                                                                                                                                                                                                                                          | STUDY FINDINGS                                                                                                                                                                                                                                                                                                                                                                                                                                                                                                                                                                                                                                                                                                                                                                                                                                                                                                                                                                                                           |
|--------------------------------------------------------------------------------------------------------------------------------------------------------------------------------------------------------------------------------------------------------------------------------------------------------------------------------------------------------------------------------------------|--------------------------------------------------------------------------------------------------------------------------------------------------------------------------------------------------------------------------------------------------------------------------------------------------------------------------------------------------------------------------------------------------------------------------------------------------------------------------------------------------------------------------------------------------------------------------------------------------------------------------------------------------------------------------------------------------------------------------------------------------------------------------------------------------------------------------------------------------------------------------------------------------------------------------------------------------------------------------------------------------------------------------|
| <p><b>JEMINIWA 2019</b></p> <p>SYSTEMATIC REVIEW AND META-ANALYSIS</p> <p>FIVE DATABASES SEARCH FROM INCEPTION UNTIL AUGUST 2018</p> <p>EHEALTH AMONG CHILDREN AND ADULT ASTHMATIC PATIENTS</p> <p><b>VS.</b></p> <p>USUAL CARE OR WITHOUT EHEALTH INTERVENTION</p> <p><b>OUTCOME MEASURES</b></p> <p>THE EFFECTIVENESS OF EHEALTH ON ADHERENCE TO ICS AND THE TYPES OF EHEALTH IN USE</p> | <p><b>eHealth</b></p> <p><b>Pros (+)</b></p> <p>All categories of eHealth across different technologies used for monitoring adherence yielded a small effect on adherence (SMD 0.41, 95% CI 0.02–0.79), and was more significant in studies utilizing EMDs to measure adherence (SMD 1.19, 95% CI 0.49–1.89).</p> <p><b>mHealth</b></p> <p><b>Pros (+)</b></p> <p>Significant effect on adherence (SMD 0.96, 95% CI 0.28–1.64) across mHealth studies using different methods in monitoring adherence and significant across mHealth studies utilizing EMDs to monitor adherence (SMD 1.28, 95% CI 0.41–2.14) and self-reports (SMD 0.52, 95% CI 0.23–0.82).</p> <p><b>eHealth</b></p> <p><b>Cons (-)</b></p> <p>Insignificant effect on adherence in studies utilizing pharmacy refill data to monitor adherence (SMD -0.13, 95% CI -0.70 – 0.44) or self-report (SMD 0.25, 95% CI -0.10 – 0.60), or electronic health records, interactive voice response, telephone calls by HCP (SMD 0.20, 95% CI -0.02 – 0.43).</p> |
| <p><b>BOUTOPOULOU 2018</b></p> <p>SYSTEMATIC REVIEW</p> <p>FOUR DATABASES SEARCH FROM JANUARY 2012 TO MARCH OF 2018</p> <p>MEDICATION ADHERENCE INTERVENTIONS AMONG SEVERE ASTHMA CHILDREN</p> <p><b>VS.</b></p> <p>WITHOUT ADHERENCE INTERVENTIONS</p> <p><b>OUTCOME MEASURES</b></p> <p>INFLUENCE OF ADHERENCE INTERVENTIONS</p>                                                         | <p><b>EMDs</b></p> <p><b>Pros (+)</b></p> <p>One prospective observational cohort study monitored adherence rates over median of 92 days interval following EMDs technology for 93 severe outpatient asthmatic children.</p> <p>The adherence rate baseline was (median 74% (21%-99%). Post EMDs, ≥80% adherence rate for 39 patients, 60-79% adherence rate for 25 patients (42%), and &lt;60% adherence rate for 29 patients (31%).</p> <p><b>Cons (-)</b></p> <p>Suboptimal adherence (adherence rate &lt;80%) remained prevalent among all children with severe asthma representing 58%.</p>                                                                                                                                                                                                                                                                                                                                                                                                                         |

|                                                                                                                                                                                                                                                                                                                                                                                                                                        |                                                                                                                                                                                                                                                                                                                                                                                                                                                                                                                                                                                                                                                                                                                                                                                                                                                                                                                                                                                                                                                                                                                                                                                                                                                                                                                                                                                        |
|----------------------------------------------------------------------------------------------------------------------------------------------------------------------------------------------------------------------------------------------------------------------------------------------------------------------------------------------------------------------------------------------------------------------------------------|----------------------------------------------------------------------------------------------------------------------------------------------------------------------------------------------------------------------------------------------------------------------------------------------------------------------------------------------------------------------------------------------------------------------------------------------------------------------------------------------------------------------------------------------------------------------------------------------------------------------------------------------------------------------------------------------------------------------------------------------------------------------------------------------------------------------------------------------------------------------------------------------------------------------------------------------------------------------------------------------------------------------------------------------------------------------------------------------------------------------------------------------------------------------------------------------------------------------------------------------------------------------------------------------------------------------------------------------------------------------------------------|
| <p><b>PEARCE 2022</b><br/>ANARRATIVE SYSTEMATIC REVIEW</p> <p>SIX DATABASES SEARCH FROM INCEPTION UNTIL OCTOBER 2020</p> <p>ADHERENCE INTERVENTION AMONG ASTHMATIC CHILDREN TO ICS WITH AT LEAST ONE OUTCOME MEASURE OF ADHERENCE <b>VS.</b> USUAL TREATMENT OR A BASIC EDUCATION</p> <p><b>OUTCOME MEASURES</b><br/>ICS ADHERENCE INTERVENTIONS IN CHILDREN WITH ASTHMA AND CHARACTERISTICS OF SUCCESSFUL ADHERENCE INTERVENTIONS</p> | <p><b>EMDs</b></p> <p><b>Pros (+)</b><br/>EMDs with audio-visual enabled Vs. EMDs with audio-visual disabled, after 6 months resulted in median adherence of 84% in the EMDs enabled group (10th percentile 54%, 90th percentile 96%), compared with 30% in the EMDs disabled group (8%, 68%) (P&lt;0.0001).<br/>EMDs with feedback was compared to EMDs alone. The EMDs with feedback group achieved higher adherence than control (median adherence for the Intervention group was 70% vs. 49% for the control group) (p &lt;0.001).<br/>Another study found mean percentage adherence for EMDs with feedback= 79% vs. 57.9% for EMDs without feedback (P&lt; 0.01).</p> <p><b>mHealth</b></p> <p><b>Cons (-)</b><br/>mHealth (text message reminder with a tip about the value of regular controller use) Vs. control group (receiving only two reminders to sync their sensors). The unadjusted MD: control = 40% vs. mHealth= 34% (P=0.56). Adjusting mean adherence for age and parental education (control=32% vs mHealth=36%, P=0.73).</p> <p><b>eHealth</b></p> <p><b>Cons (-)</b><br/>A web-based interactive education and monitoring system including education, self-monitoring, and rewards Vs. control (receiving an asthma education manual). Mean change since adherence rate baseline (38%) for intervention 11.2% increase vs. control= 4.4% decrease (P=0.67).</p> |
| <p><b>LEE 2021</b><br/>SYSTEMATIC REVIEW AND META-ANALYSIS</p> <p>SEVEN DATABASES SEARCH FROM INCEPTION UNTIL APRIL 2021</p> <p>EMD <b>VS.</b> USUAL CARE</p> <p><b>OUTCOME MEASURES</b><br/>INHALER ADHERENCE AND CLINICAL OUTCOMES</p>                                                                                                                                                                                               | <p><b>EMDs</b></p> <p><b>Pros (+)</b><br/>EMDs group was 1.50 times (RR = 1.50, 95% CI 1.19–1.90) more likely to adhere to inhalers VS. control (P&lt;0.001) with medium-to-large effect size (g=0.64).<br/>Significant improvement in Children Asthma Control Test (C-ACT) in EMDs group (P=0.02) with a small effect size (g=0.33).</p> <p><b>Cons (-)</b><br/>No significant differences in asthma exacerbation events per year (risk ratio 0.89, 95% CI 0.45–1.75) (P=0.72), or asthma control using ACQ scores (Z -0.91, P=0.36) and ACT scores (Z 0.95, P=0.34).</p>                                                                                                                                                                                                                                                                                                                                                                                                                                                                                                                                                                                                                                                                                                                                                                                                             |

|                                                                                                                                                                                                                                                                                                                                                                                                                                                                                                                                                                                          |                                                                                                                                                                                                                                                                                                                                                                                                                                                                                                                                                                                                                                                                                                                                                                                                                                                                                                                                                                                                                                                                                                                                                             |
|------------------------------------------------------------------------------------------------------------------------------------------------------------------------------------------------------------------------------------------------------------------------------------------------------------------------------------------------------------------------------------------------------------------------------------------------------------------------------------------------------------------------------------------------------------------------------------------|-------------------------------------------------------------------------------------------------------------------------------------------------------------------------------------------------------------------------------------------------------------------------------------------------------------------------------------------------------------------------------------------------------------------------------------------------------------------------------------------------------------------------------------------------------------------------------------------------------------------------------------------------------------------------------------------------------------------------------------------------------------------------------------------------------------------------------------------------------------------------------------------------------------------------------------------------------------------------------------------------------------------------------------------------------------------------------------------------------------------------------------------------------------|
| <p><b>CHAN 2022</b><br/>SYSTEMATIC REVIEW AND<br/>META-ANALYSIS</p> <p>SEARCH FOR CLINICAL TRIALS<br/>FROM THE COCHRANE<br/>AIRWAYS TRIALS REGISTER<br/>FROM FROM INCEPTION<br/>UNTIL JUNE 2020</p> <p>DIGITAL INTERVENTIONS<br/>AMONG CHILDREN AND<br/>ADULT ASTHMATIC PATIENTS<br/><b>VS.</b><br/>ANY NON-DIGITAL<br/>INTERVENTIONS</p> <p><b>OUTCOME MEASURES</b><br/>ADHERENCE<br/>ASTHMA CONTROL<br/>ASTHMA EXACERBATIONS<br/>UNSCHEDULED GP VISITS<br/>TIME OFF SCHOOL, WORK<br/>DUE TO ASTHMA<br/>LUNG FUNCTION<br/>QUALITY OF LIFE<br/>COST-EFFECTIVENESS<br/>ADVERSE EVENTS</p> | <p><b>Digital interventions</b></p> <p><b>Pros (+)</b><br/>Adherence rate improved by almost 15% with the use of digital technologies Vs. control (MD 14.66%, 95% CI 7.74 to 21.57).<br/>Asthma control as change from baseline of various scales improve by a small (SMD 0.31, 95% CI 0.17 to 0.44).<br/>Asthma exacerbations (<math>\geq 1</math> asthma exacerbation) reduced (risk ratio 0.53, 95% CI 0.32 to 0.91) (P=0.02).<br/>Quality of life increased (SMD 0.26 higher, 95% CI 0.07 to 0.45) (P=0.007).</p> <p><b>EMDs &amp; mHealth</b></p> <p><b>Pros (+)</b><br/>Adherence improved better with EMDs (MD 23% higher, 95% CI 10.84 to 34.16) (P=0.0002) compared to control group.<br/>Adherence improved better with short message services (SMS) (MD 12% higher, 95% CI 6.22 to 18.03) (P&lt; 0.0001) compared to control group.<br/>No significant subgroup differences for participant age ranging from 2 to 98 years old, for a total of 15,207 participants from 30 studies.</p> <p><b>Cons (-)</b><br/>No significant subgroup differences in FEV1.<br/>No data on missed school or workdays, cost-effectiveness, or adverse events.</p> |
| <p><b>BERG 1998</b><br/>A RANDOMIZED,<br/>CONTROLLED STUDY</p> <p>SIX-WEEK SELF-<br/>MANAGEMENT PROGRAM.</p> <p>31 ADULTS WITH ASTHMA<br/>USING MDI CHRONOLOG<br/><b>VS.</b><br/>24 ADULTS WITH ASTHMA<br/>USING ASTHMA DIARY<br/>NOTES</p> <p><b>OUTCOME MEASURES</b><br/>ADHERENCE SCORES</p>                                                                                                                                                                                                                                                                                          | <p><b>EMDs (MDI Chronolog)</b></p> <p><b>Pros (+)</b><br/>Adherence rates measured by MDI Chronolog showed 26% of the experimental group had &gt; 80% adherence rates Vs. 4% in the control group.</p> <p><b>Cons (-)</b><br/>In each arm of intervention, self-reported adherence rates were higher than the monitored adherence rates.</p>                                                                                                                                                                                                                                                                                                                                                                                                                                                                                                                                                                                                                                                                                                                                                                                                                |
